# Supplementary material for: Membrane-Bound Transcription Factor ZmNAC074 Positively Regulates Abiotic Stress Tolerance in Transgenic Arabidopsis
Source: MDPI journal article supplement (doi:10.3390/ijms242216157), 2023-11-10
Supplement: s1 [file s1]

# Supplementary materials

Table S1 Primer sequences for RT-qPCR

| Gene name       | Forward primer sequence(5' →3' ) | Reverse primer sequence(5' →3' ) |
|-----------------|----------------------------------|----------------------------------|
| <i>ZmNAC074</i> | GTGGACTACTACAAGTTCGACT           | GTCGACGATCTTTCCAGACTTA           |
| <i>AtP5CS1</i>  | AGCTTGATGACGTTATCGATCT           | AGATTCCATCAGCATGACCTAG           |
| <i>AtP5CS2</i>  | GTGCAAAACTGAATATTCCGGA           | TTCTACAATTTCAACGGTGCAG           |
| <i>AtDREB2A</i> | CATGTTTGATGTCGATGAGCTT           | ATTCCGTAGTTGAGGCTTTGTA           |
| <i>AtDREB2B</i> | GTATATGAACAAACCGGAACCG           | ATACAACCTTTCTTCGACCCTT           |
| <i>AtAPX2</i>   | GAAATAGTTGCCTTGTCTGGTG           | CATTTCACTGTCCATGACTGTC           |
| <i>AtbZIP60</i> | GAAGGAGACGATGATGCTGTGGCT         | AGCAGGGAACCCAACAGCAGACT          |
| <i>AtBZIP28</i> | TTACTTGATCCAAGAGAGGTCG           | AGGTAACGTACTTGACACTGTC           |
| <i>AtBIP3</i>   | CGTATAATCAATGAGCCAACGG           | CCACCACCAAGATCATATACGA           |
| <i>AtPDI5</i>   | GATTCCAAGGATTTGATGGTG            | CAACATCGCCTTGGTATTAGTG           |
| <i>AtCNX1</i>   | CACCTGTGGAAAAGAAGAAACCAG         | CAAGCAACCAGTTGTTACTACTG          |
| <i>AtActin1</i> | CTCCTTTGTTGCTGTTGACTAC           | GCACAATGTTACCGTACAGATC           |
